# Supplementary material
Source: PubMed Central journal article supplement (PMC3568303)
Supplement: 1215232110_pnas.201215232SI.pdf [file 1215232110_pnas.201215232SI.pdf]

# Supporting Information

Lackner et al. 10.1073/pnas.1215232110

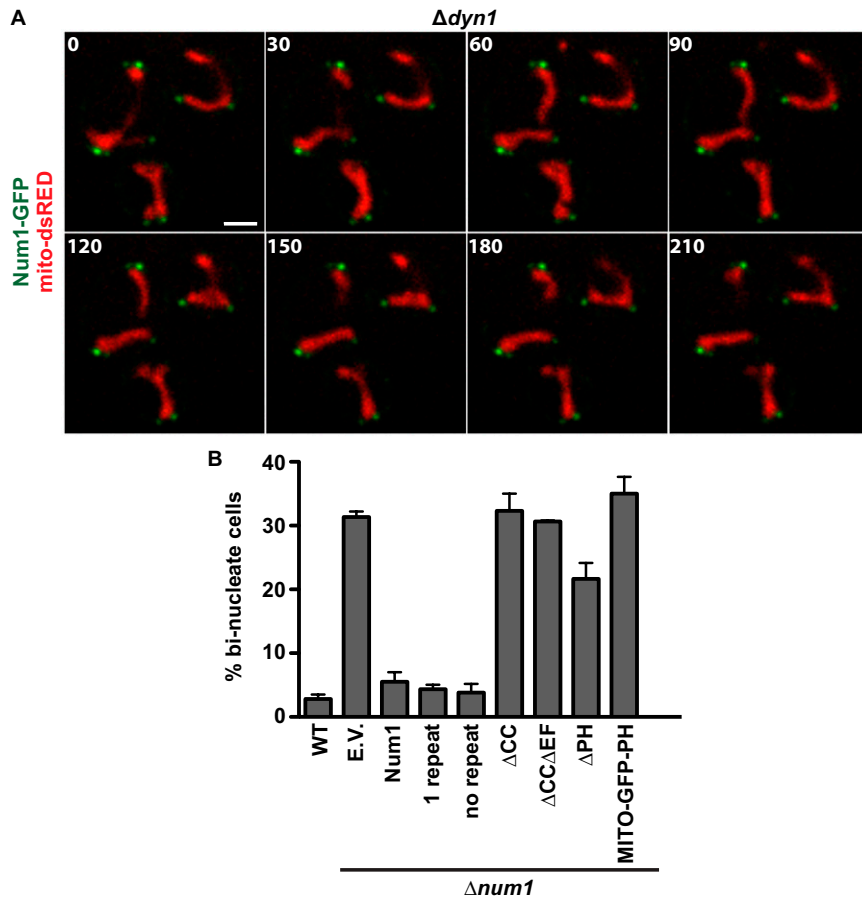

**Fig. S1.** The role of Num1 in Dyn1-mediated nuclear migration is distinct from its role in mitochondrial tethering and distribution. (A) Time-lapse images of *Δdyn1* cells expressing Num1-GFP and mito-dsRED. A single focal plane is shown. Time is shown in seconds. (Scale bar, 2  $\mu$ m.) (B) Quantification of the percent of binucleate cells observed, as assessed by DAPI staining, after growth of the indicated strains at 12  $^{\circ}$ C for 16 h. Data are shown as the mean  $\pm$  SE of three independent experiments, in each of which 200 cells were counted. E.V., empty vector.



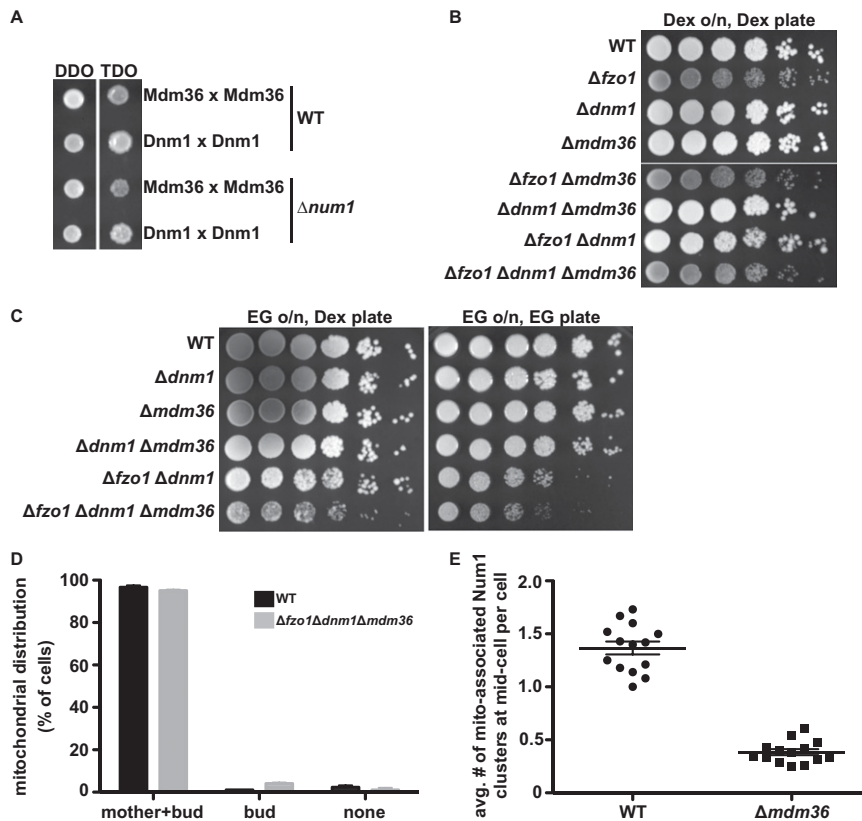

**Fig. 54.** Mdm36 is important but not essential for Num1-mediated mitochondrial tethering. (A) Yeast two-hybrid analysis to assess the interaction of a Gal4AD-Mdm36 fusion with a Gal4BD-Mdm36 fusion in the presence (WT) or absence ( $\Delta num1$ ) of Num1. Dnm1 self-interaction was used as a positive control. Protein-protein interactions were assessed as in Fig. 5D. DDO, double dropout; TDO, triple dropout. (B)  $\Delta fzo1 \Delta dnm1 \Delta mdm36$  cells exhibit a growth defect. After growth in yeast extract/peptone/dextrose (YPD) medium, serial dilutions of the indicated strains were plated on YPD medium and grown at 30 °C. (C) After growth in yeast extract/peptone/ethanol/glycerin (YPEG) medium to ensure that all cells possessed mtDNA at the start of the growth assay, serial dilutions of the indicated strains were plated on YPD or YPEG medium, as indicated, and were grown at 30 °C. (D) The distribution of mitochondria in  $\Delta fzo1 \Delta dnm1 \Delta mdm36$  cells expressing mito-dsRED was analyzed by fluorescence microscopy after growth at 30 °C. Cells were stained with calcofluor to image septa and bud scars to distinguish mother and daughter cells. Data are shown as the mean  $\pm$  SE of three independent experiments, in each of which >70 cells were counted. (E) The number of mitochondrial-associated Num1 clusters at midcell was quantified in wild-type and  $\Delta mdm36$  cells expressing Num1-GFP and mito-dsRED. Each point represents the average number of mitochondrial-associated Num1 clusters found at midcell per cell in a field of  $\geq 10$  cells. A total of 14 fields and >200 cells were analyzed.

|                                |                | <b><math>\Delta</math>mdm36<br/>Num1-yEGFP</b>         |
|--------------------------------|----------------|--------------------------------------------------------|
|                                | <b>Num1</b>    | <b>340 <math>\pm</math> 17 (67 <math>\pm</math> 2)</b> |
| <b>PM/mito</b>                 | <b>Pil1</b>    | <b>52 <math>\pm</math> 4 (71 <math>\pm</math> 3)</b>   |
|                                | <b>Lsp1</b>    | <b>27 <math>\pm</math> 3 (52 <math>\pm</math> 5)</b>   |
| <b>PM</b>                      | <b>Seg1</b>    | <b>17 <math>\pm</math> 2 (20 <math>\pm</math> 2)</b>   |
|                                | <b>Eis1</b>    | <b>10 <math>\pm</math> 1 (15 <math>\pm</math> 2)</b>   |
|                                | <b>Msc3</b>    | <b>27 <math>\pm</math> 5 (35 <math>\pm</math> 4)</b>   |
|                                | <b>YGR130C</b> | <b>3 <math>\pm</math> 0.3 (5 <math>\pm</math> 4)</b>   |
| <b>mito/ER</b>                 | <b>Rtn1</b>    | <b>15 <math>\pm</math> 0.3 (40 <math>\pm</math> 3)</b> |
| <b>ER</b>                      | <b>Scs2</b>    | <b>6 <math>\pm</math> 1 (26 <math>\pm</math> 1)</b>    |
| <b>nucleus/<br/>nucleolous</b> | <b>Nop 7</b>   | <b>4 <math>\pm</math> 2 (7 <math>\pm</math> 4)</b>     |
|                                | <b>Rpf4</b>    | <b>2 <math>\pm</math> 0.3 (7 <math>\pm</math> 2)</b>   |
|                                | <b>Nop16</b>   | <b>2 <math>\pm</math> 1 (8 <math>\pm</math> 4)</b>     |
| <b>unknown</b>                 | <b>Dcr2</b>    | <b>1 <math>\pm</math> 0 (1 <math>\pm</math> 0)</b>     |

**Fig. S5.** Proteomic analysis of proteins that copurify with Num1-GFP in the absence of Mdm36. Proteomic analysis of Num1-GFP immunoprecipitated from  $\Delta$ mdm36 cells as described in *Methods*. The number of peptides (and percent coverage) is shown for each identified protein. Data are shown as the mean  $\pm$  SE of four independent experiments.



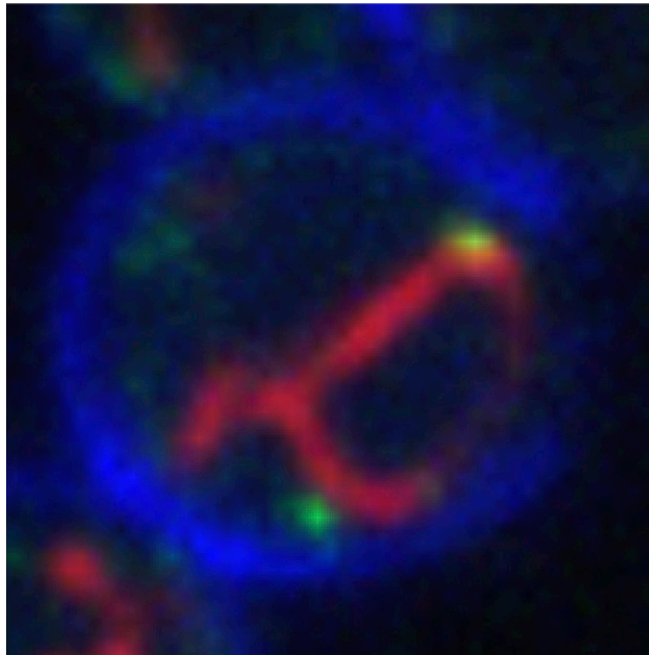

**Movie S1.** Num1-marked mitochondria–cortex anchor points. Movie of time-lapse images shown in Fig. 2A. (Scale bar, 2  $\mu\text{m}$ .)

[Movie S1](#)
